# Supplementary material
Source: MDPI journal article supplement (https://www.mdpi.com/2071-1050/10/4/1277)
Supplement: s1 [file s1]

# Impact of Future Climate Change on Wheat Production: Simulated Case for China's Wheat System

Dengpan Xiao <sup>1</sup>, Huizi Bai <sup>1,\*</sup> and De Li Liu <sup>2,3,\*</sup>

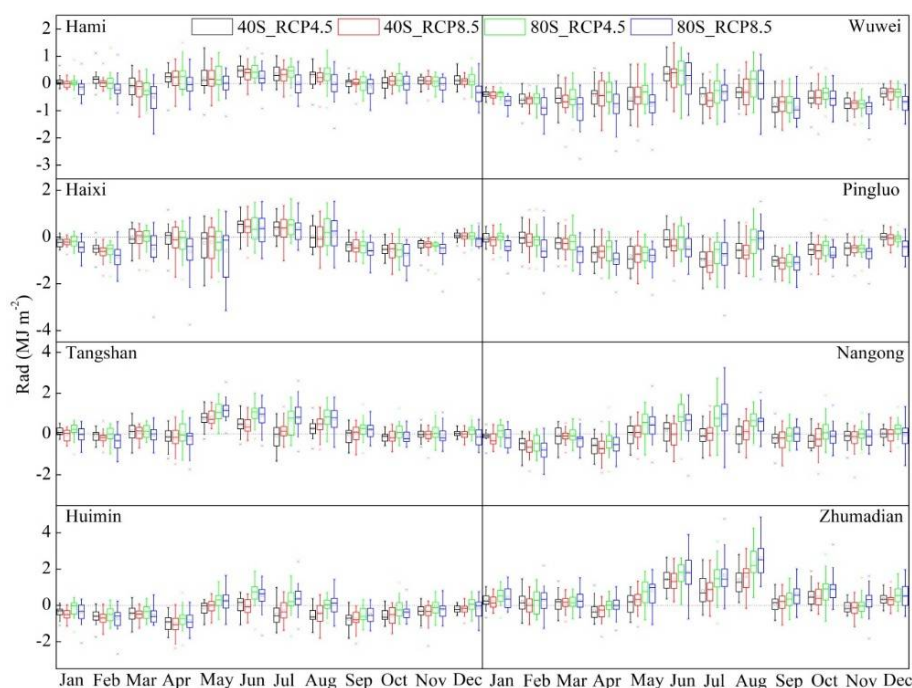

**Figure S1.** Changes in monthly mean daily radiation (Rad) for the 40S (2031–2060) and 80S (2071–2100) with baseline (1981–2010) periods under RCP4.5 and RCP8.5 conditions.

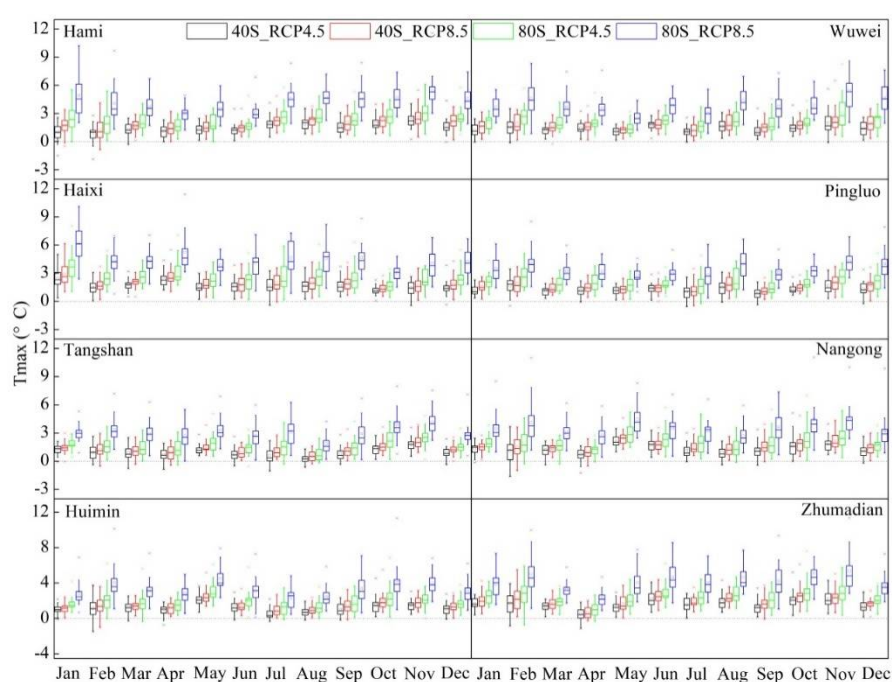

**Figure S2.** Changes in monthly daily maximum temperature (Tmax) for the 40S (2031–2060) and 80S (2071–2100) with baseline (1981–2010) periods under RCP4.5 and RCP8.5 conditions.

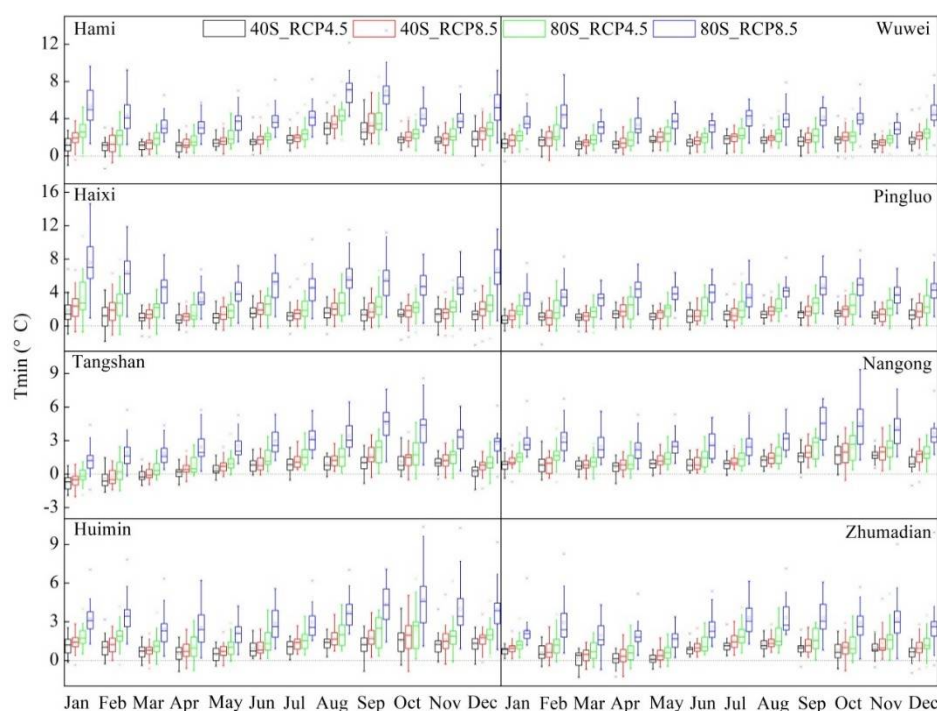

**Figure S3.** Changes in monthly daily minimum temperature ( $T_{min}$ ) for the 40S (2031–2060) and 80S (2071–2100) with baseline (1981–2010) periods under RCP4.5 and RCP8.5 conditions.

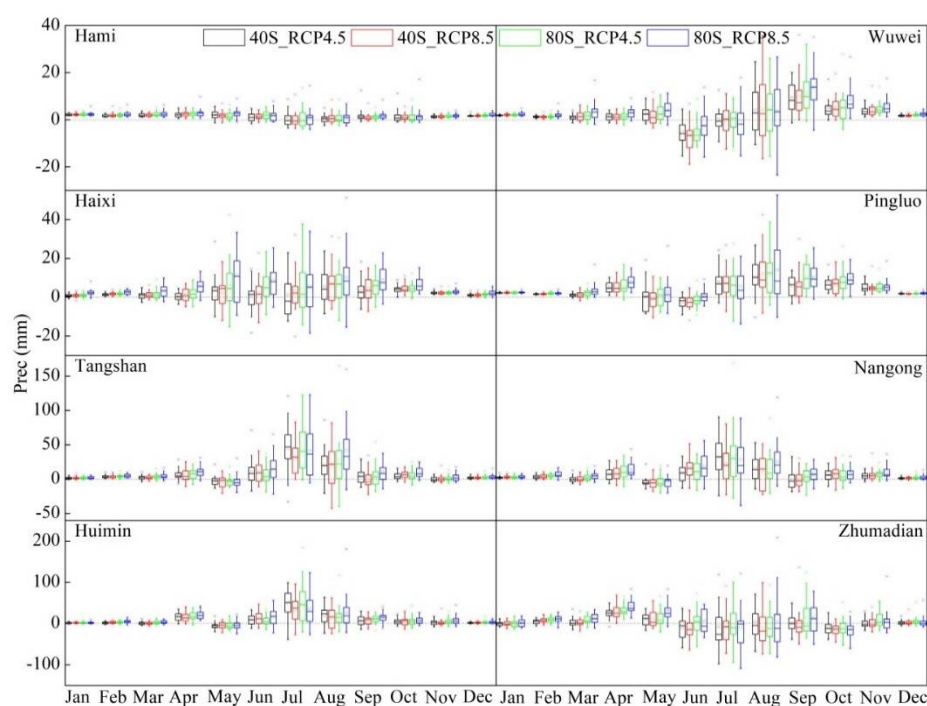

**Figure S4.** Changes in mean monthly total precipitation (Prec) for the 40S (2031–2060) and 80S (2071–2100) with baseline (1981–2010) periods under RCP4.5 and RCP8.5 conditions.
